# Supplementary material for: Monitoring Crimean-Congo haemorrhagic fever virus RNA shedding in body secretions and serological status in hospitalised patients, Turkey, 2015
Source: PubMed Central journal article supplement (PMC7078823; doi:10.2807/1560-7917.es.2020.25.10.1900284), 2020-03-12
Supplement: 19-00284_YAGCI-CAGLAYIK_Supplement.pdf [file 19-00284_YAGCI-CAGLAYIK_Supplement.pdf]

## PATIENTS' VIRAL LOADS AND ANTIBODY RESPONSES

This supplementary material is hosted by *Eurosurveillance* as supporting information alongside the article "Monitoring Crimean-Congo Haemorrhagic Fever Virus RNA Shedding in Body Secretions and Serological Status in Hospitalised Patients, Turkey, 2015" on behalf of the authors who remain responsible for the accuracy and appropriateness of the content. The same standards for ethics, copyright, attributions and permissions as for the article apply. Supplements are not edited by *Eurosurveillance* and the journal is not responsible for the maintenance of any links or email addresses provided therein.

|          | 7        | 8        | 9        | 19       |
|----------|----------|----------|----------|----------|
| Serum    | 9,92E+01 | 7,82E+01 | 2,86E+01 | Negative |
| Nasal    | 1,79E+02 | 4,89E+03 | 1,52E+01 | Negative |
| Oral     | 9,85E+02 | Negative | Negative | Negative |
| Urine    | 1,25E+02 | 1,48E+02 | 1,25E+02 | Negative |
| Vaginal* | 3,45E+04 | 2,74E+04 | 2,14E+03 | Negative |
| Fecal    | 3,17E+02 | 1,42E+03 | 2,93E+03 | Negative |
| IGM      | 2,97     | 3,00     | 3,00     | 3        |
| IGG      | 0,56     | 3,00     | 0,92     | 2,11     |

Table-S1: Y1 coded patient (viral loads in copies/mL and OD values on monitored days) \*Vaginal viral load is higher than urine and serum. Viral load of urine is higher than serum on follow-up days.

|          | 1        | 2        | 3        | 4        | 5        | 6        | 7        | 8        | 9        | 10       | 11       |
|----------|----------|----------|----------|----------|----------|----------|----------|----------|----------|----------|----------|
| Serum*   | 2,58E+05 | 1,39E+05 | 7,47E+04 | 4,93E+03 | 1,07E+03 | 5,46E+01 | 3,08E+00 | Negative | Negative | Negative | Negative |
| Nasal    | 9,59E+02 | 5,12E+02 | N/A      | 5,36E+01 | 2,41E+03 | 7,21E+02 | 6,08E+01 | 8,04E+00 | Negative | Negative | Negative |
| Oral     | 2,24E+02 | 2,46E+02 | N/A      | 6,08E+02 | 1,08E+01 | 1,00E+00 | Negative | Negative | Negative | Negative | Negative |
| Urine    | Negative | Negative | N/A      | Negative | 2,73E+01 | 1,99E+01 | Negative | 1,27E+01 | Negative | Negative | Negative |
| Urethral | Negative | Negative | N/A      | 4,65E+01 | 1,43E+01 | Negative | Negative | Negative | 1,96E+00 | Negative | Negative |
| Fecal    | Negative | Negative | N/A      | Negative | 2,67E+01 | Negative | Negative | Negative | Negative | Negative | Negative |
| IGM      | 0,138    | 0,096    | 0,288    | 0,567    | 1,371    | 2,805    | 2,779    | 2,333    | 2,247    | 1,861    | 1,876    |
| IGG      | 0,065    | 0,033    | 0,036    | 0,072    | 0,172    | 0,211    | 0,347    | 0,957    | 1,542    | 1,886    | 3        |

Table-S2: Y2 coded patient (viral loads in copies/mL and OD values on monitored days) (N/A: not sent to the laboratory) \*There is viral clearance in serum on 8th day, but not in urine and not urethral swab on the 9th day. IgM is detected on 3rd day, IgG on 7th day.

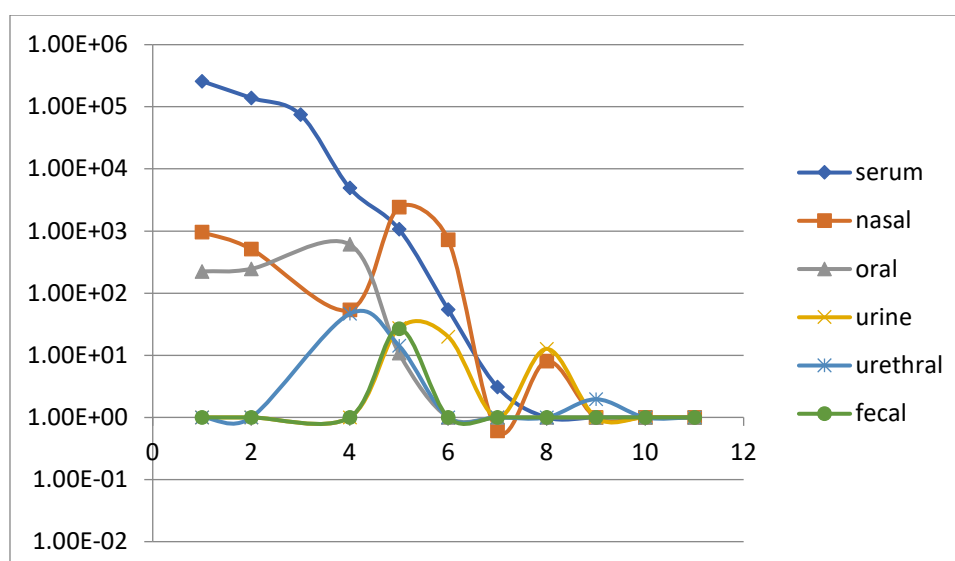

Figure S1: Y2 coded patient's viral load slope according to days

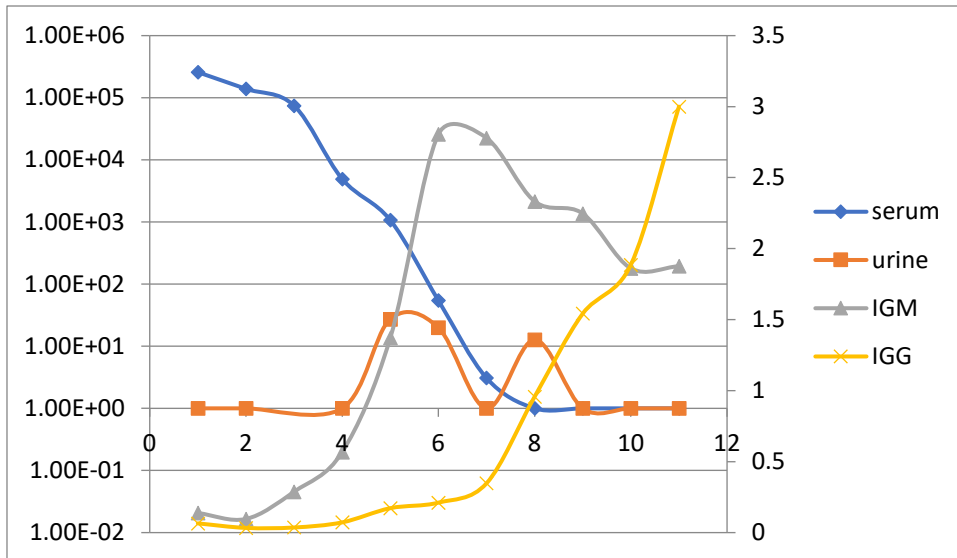

Figure S2: Y2 coded patient's antibody response and viral load slope according to days

|         | 3        | 4        | 5        | 6        | 7        | 8        | 9        | 10       | 11       | 12       | 13       |
|---------|----------|----------|----------|----------|----------|----------|----------|----------|----------|----------|----------|
| Serum*  | 1,59E+07 | 6,25E+05 | 3,19E+05 | 7,12E+03 | 4,07E+03 | 8,98E+03 | 2,00E+03 | 4,68E+03 | 2,22E+03 | 2,47E+05 | 1,46E+03 |
| Nasal   | 4,50E+03 | 3,69E+01 | 2,03E+02 | 8,88E+02 | Negative | Negative | Negative | Negative | N/A      | Negative | Negative |
| Oral    | 1,43E+03 | 8,88E+00 | 4,03E+01 | 1,73E+02 | Negative | Negative | Negative | Negative | Negative | Negative | Negative |
| Urine   | 4,75E+01 | 3,63E+00 | 8,90E+00 | 9,26E+01 | 5,38E+02 | 1,55E+03 | 1,49E+03 | 4,40E+03 | 3,92E+03 | 5,62E+02 | Negative |
| Vaginal | 2,01E+01 | 7,20E+01 | 2,86E+01 | 2,79E+02 | 8,58E+02 | Negative | Negative | Negative | Negative | Negative | Negative |
| Fecal   | Negative | Negative | Negative | 2,38E+03 | 4,54E+01 | Negative | Negative | Negative | N/A      | Negative | Negative |
| IGM     | 0,018    | 0,042    | 0,158    | 1,549    | 1,961    | 3        | 3        | 3        | 2,412    | 0,728    | 1,482    |
| IGG     | 0,073    | 0,146    | 0,153    | 0,191    | 0,222    | 0,223    | 0,286    | 0,301    | 0,443    | 0,478    | 0,589    |

Table-S3: Y3 coded patient (viral loads in copies/mL and OD values on monitored days) (N/A: not sent to the laboratory) \*On the 12th day Anti-CCHFV IgM decreases and serum viral load increases. While serum viral load decreases, viral load of urine increases on the 4th to 11th day.

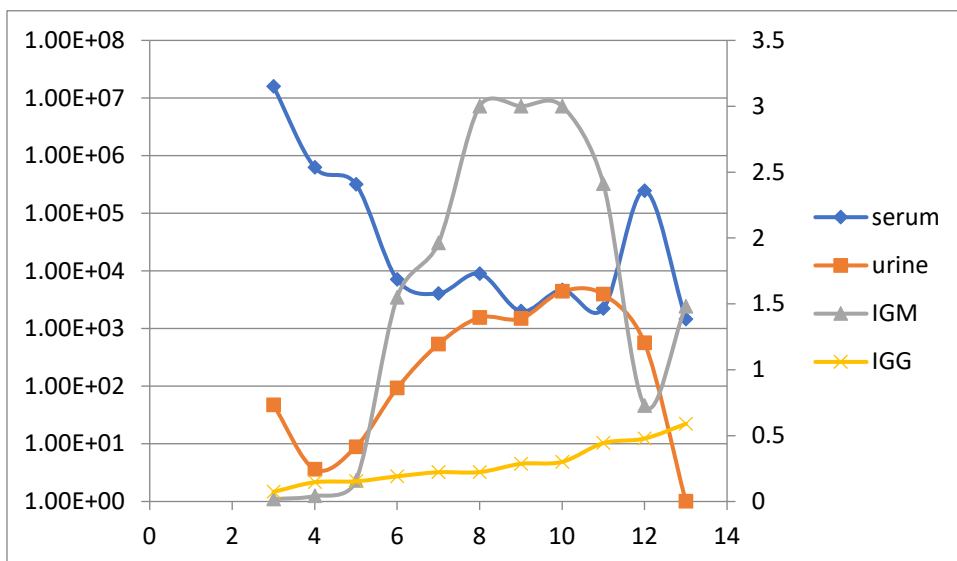

Figure S3: Y3 coded patient's antibody response and viral load slope according to days

|         | 5        | 6        | 7        |
|---------|----------|----------|----------|
| Serum   | 1,93E+03 | 1,69E+03 | 5,12E+03 |
| Nasal   | 8,78E+02 | Negative | 3,18E+03 |
| Oral    | 3,11E+03 | 5,40E+02 | 5,38E+03 |
| Urine   | 1,85E+03 | 1,45E+03 | 7,64E+03 |
| Vaginal | 3,84E+03 | 1,43E+02 | 5,20E+03 |
| Fecal*  | Negative | Negative | 2,06E+03 |
| IGM     | 0,817    | 1,019    | 1,918    |
| IGG     | 0,097    | 0,059    | 0,1      |

Table-S4: Y4 coded patient (viral loads in copies/mL and OD values on monitored days) \*Fecal swab is positive on the 7th day, negative on the 5th and 6th day.

|          | 4        | 5        | 6        | 7        | 8        | 9        | 10       |
|----------|----------|----------|----------|----------|----------|----------|----------|
| Serum*   | 5,66E+04 | 1,57E+05 | 1,70E+05 | 3,47E+05 | 8,06E+05 | 3,18E+03 | 1,92E+03 |
| Nasal    | 1,13E+03 | Negative | 3,70E+03 | Negative | Negative | Negative | N/A      |
| Oral     | 1,71E+03 | 5,89E+04 | 6,47E+04 | 1,00E+00 | 8,68E+03 | Negative | N/A      |
| Urine    | 2,82E+01 | Negative | Negative | Negative | 8,07E+02 | 2,31E+03 | N/A      |
| Urethral | 6,85E+03 | Negative | 6,63E+03 | 3,31E+03 | 5,96E+03 | 4,76E+03 | N/A      |
| Fecal    | Negative | 3,90E+04 | 6,48E+03 | Negative | Negative | Negative | N/A      |
| IGM      | 0,081    | 0,316    | 0,298    | 0,92     | 1,602    | 1,636    | 1,438    |
| IGG      | 0,031    | 0,032    | 0,078    | 0,122    | 0,182    | 0,211    | 0,423    |

Table-S5: Y5 coded patient (viral loads in copies/mL and OD values on monitored days) \*While serum viral load decreases, viral load of urine increases on the 8th and 9th day.

|          | 5        | 6        | 7        | 8        | 9        | 10       | 11    | 12    |
|----------|----------|----------|----------|----------|----------|----------|-------|-------|
| Serum    | N/A      | Negative | Negative | Negative | Negative | Negative | N/A   | N/A   |
| Nasal    | Negative | Negative | Negative | Negative | Negative | Negative | N/A   | N/A   |
| Oral     | Negative | Negative | Negative | Negative | Negative | Negative | N/A   | N/A   |
| Urine    | N/A      | Negative | Negative | Negative | Negative | Negative | N/A   | N/A   |
| Urethral | N/A      | N/A      | Negative | Negative | Negative | Negative | N/A   | N/A   |
| Fecal    | Negative | Negative | Negative | Negative | Negative | Negative | N/A   | N/A   |
| IGM      | 1,218    | 1,632    | 1,743    | 1,733    | 2,151    | 1,876    | 1,922 | 1,179 |
| IGG      | 0,072    | 0,057    | 0,063    | 0,068    | 0,168    | 0,164    | 0,199 | 0,06  |

Table-S6: Y6 coded patient who was started Ribavirin on the 1st day (viral loads in copies/mL and OD values on monitored days)

|          | 6        | 7        | 8        | 9        |
|----------|----------|----------|----------|----------|
| Serum    | 1,57E+04 | 1,51E+01 | 1,38E+01 | 3,91E+00 |
| Nasal    | 4,65E+03 | 1,45E+02 | 6,77E+01 | Negative |
| Oral     | 2,43E+02 | 1,24E+02 | Negative | Negative |
| Urine*   | 1,74E+01 | Negative | 1,01E+01 | 1,13E+01 |
| Urethral | 1,14E+02 | 9,39E+01 | 7,52E+02 | 3,28E+02 |
| Fecal    | 1,21E+02 | 3,99E+01 | 3,60E+01 | 9,74E+00 |
| IGM      | 1,624    | 2,297    | 2,013    | 1,828    |
| IGG      | 0,09     | 0,222    | 0,526    | 1,616    |

Table-S7: N1 coded patient who was started Ribavirin on the 6th day (viral loads in copies/mL and OD values on monitored days) \*While serum viral load decreases, viral load of urine stays at the same log value.

|         | 6        | 7        | 8        | 9        |
|---------|----------|----------|----------|----------|
| Serum   | 2,23E+02 | 4,84E+00 | 6,37E+00 | 1,74E+00 |
| Nasal   | 4,87E+00 | 6,10E+01 | 4,65E+00 | 1,19E+03 |
| Oral    | Negative | 2,29E+00 | Negative | Negative |
| Urine   | 1,39E+01 | Negative | Negative | Negative |
| Vaginal | 7,35E+01 | Negative | Negative | Negative |
| Fecal   | Negative | Negative | Negative | Negative |
| IGM     | 0,896    | 1,301    | 1,117    | 1,174    |
| IGG     | 0,052    | 0,069    | 0,078    | 0,12     |

Table-S8: N2 coded patient who was started Ribavirin on the 6th day (viral loads in copies/mL and OD values on monitored days)

|       | 3        | 4        | 5        | 6        | 7        | 8        | 9        |
|-------|----------|----------|----------|----------|----------|----------|----------|
| Serum | Negative | Negative | Negative | Negative | Negative | Negative | Negative |
| Nasal | Negative | Negative | Negative | Negative | Negative | Negative | Negative |
| Oral  | Negative | Negative | Negative | Negative | Negative | Negative | Negative |
| Urine | Negative | Negative | Negative | Negative | Negative | Negative | Negative |
| Fecal | Negative | Negative | Negative | Negative | Negative | Negative | Negative |
| IGM   | 0,026    | 0,067    | 0,391    | 1,099    | 1,654    | 1,846    | N/A      |
| IGG   | 0,047    | 0,05     | 0,051    | 0,066    | 0,083    | 0,112    | N/A      |

Table-S9: C1 coded patient who was started Ribavirin on the 1st day (viral loads in copies/mL and OD values on monitored days)

|       | 3        | 4        | 5        | 6        | 7        | 8        | 9        |
|-------|----------|----------|----------|----------|----------|----------|----------|
| Serum | 1,83E+02 | 4,91E+02 | 9,54E+03 | Negative | Negative | N/A      | Negative |
| Nasal | 2,44E+01 | 1,00E+00 | Negative | N/A      | N/A      | Negative | Negative |
| Oral  | 6,51E+01 | Negative | Negative | Negative | Negative | Negative | Negative |
| Urine | Negative | Negative | Negative | N/A      | Negative | Negative | Negative |
| Fecal | Negative | Negative | Negative | N/A      | Negative | Negative | Negative |
| IGM   | 0,646    | 0,831    | 0,895    | 0,793    | 0,674    | 0,31     | 0,774    |
| IGG   | 0,101    | 0,282    | 0,758    | 1,882    | 2,381    | 2,153    | 3        |

Table-S10: C2 coded patient who was started Ribavirin on the 1st day (viral loads in copies/mL and OD values on monitored days)

|       | 4        | 5        | 6        | 7        | 8        | 9        |
|-------|----------|----------|----------|----------|----------|----------|
| Serum | Negative | Negative | Negative | Negative | Negative | Negative |
| Nasal | Negative | Negative | N/A      | Negative | Negative | Negative |
| Oral  | Negative | Negative | N/A      | Negative | Negative | Negative |
| Urine | Negative | Negative | N/A      | Negative | Negative | Negative |
| Fecal | 1,72E+02 | Negative | N/A      | Negative | Negative | Negative |
| IGM   | 3        | 3        | 2,492    | 2,926    | 2,561    | 2,82     |
| IGG   | 0,256    | 0,592    | 0,73     | 1,058    | 1,087    | 1,316    |

Table-S11: C3 coded patient who was started Ribavirin on the 1st day (viral loads in copies/mL and OD values on monitored days)

|          | 5        | 6        | 7        | 8        | 9        |
|----------|----------|----------|----------|----------|----------|
| Serum    | 6,51E+03 | 5,06E+03 | 2,12E+02 | Negative | Negative |
| Nasal    | Negative | Negative | Negative | Negative | Negative |
| Oral     | 8,03E+02 | Negative | Negative | Negative | Negative |
| Urine    | Negative | Negative | Negative | Negative | Negative |
| Urethral | Negative | N/A      | Negative | Negative | Negative |
| Fecal    | Negative | Negative | Negative | Negative | Negative |
| IGM      | N/A      | 0,226    | 1,119    | 2,14     | 2,912    |
| IGG      | N/A      | 0,037    | 0,09     | 0,068    | 0,045    |

Table-S12: H1 coded patient who was started Ribavirin on the 4th day (viral loads in copies/mL and OD values on monitored days)

|         | 7        | 8        | 9        | 10       | 11       | 12       | 13  | 14       |
|---------|----------|----------|----------|----------|----------|----------|-----|----------|
| Serum   | 4,59E+06 | 5,15E+05 | 1,58E+05 | 3,33E+03 | 2,35E+03 | N/A      | N/A | 1,45E+03 |
| Nasal   | Negative | Negative | 2,39E+03 | 3,02E+03 | Negative | N/A      | N/A | Negative |
| Oral    | Negative | 3,16E+04 | 7,96E+04 | Negative | Negative | N/A      | N/A | Negative |
| Urine   | 9,28E+01 | 2,41E+02 | 2,22E+02 | 1,30E+03 | N/A      | 2,41E+03 | N/A | 8,76E+03 |
| Vaginal | Negative | Negative | 1,63E+03 | 4,35E+03 | 4,23E+03 | N/A      | N/A | Negative |
| Fecal   | Negative | 1,15E+04 | 1,37E+03 | Negative | 9,25E+02 | N/A      | N/A | Negative |
| IGM     | 0,392    | 1,053    | 2,025    | 2,435    | N/A      | 2,292    | N/A | 1,595    |
| IGG     | 0,025    | 0,04     | 0,047    | 0,102    | N/A      | 0,093    | N/A | 0,355    |

Table-S13: H2 coded patient who was started Ribavirin on the 4th day (viral loads in copies/mL and OD values on monitored days) \*Anti-CCHFV IgM increases and serum viral load decreases. While serum viral load decreases, viral load of urine increases on the 7th to 14th day.

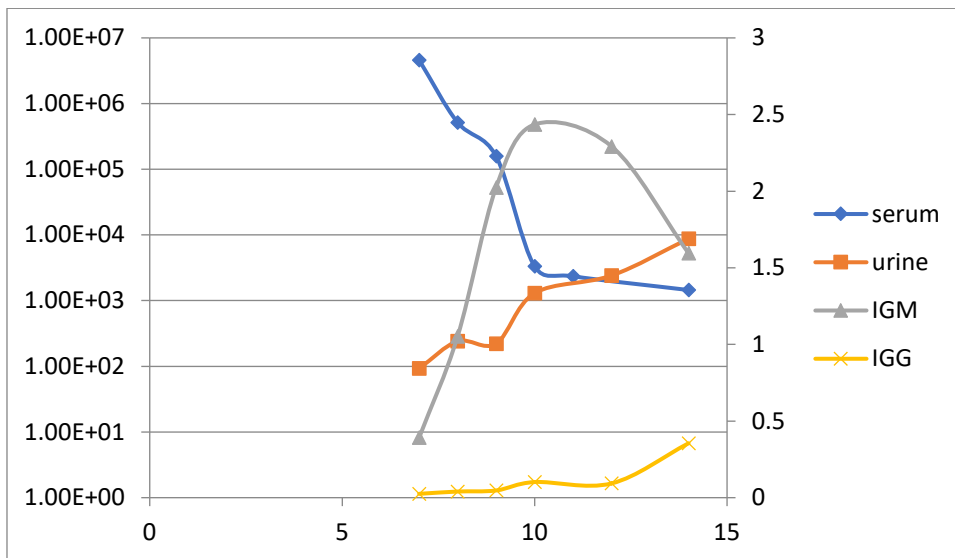

Figure S4: H2 coded patient's antibody response and viral load slope according to days

|          | 3        | 4        | 5        | 6        | 7   | 8   | 9   | 10       |
|----------|----------|----------|----------|----------|-----|-----|-----|----------|
| Serum    | 3,43E+03 | 9,89E+02 | Negative | Negative | N/A | N/A | N/A | Negative |
| Nasal    | Negative | 1,45E+02 | Negative | Negative | N/A | N/A | N/A | Negative |
| Oral     | 2,02E+04 | 1,05E+03 | Negative | Negative | N/A | N/A | N/A | Negative |
| Urine    | Negative | Negative | Negative | Negative | N/A | N/A | N/A | Negative |
| Urethral | N/A      | Negative | Negative | Negative | N/A | N/A | N/A | Negative |
| Fecal    | Negative | Negative | Negative | Negative | N/A | N/A | N/A | Negative |
| IGM      | 1,728    | 1,323    | 1,834    | 1,716    | N/A | N/A | N/A | 1,034    |
| IGG      | 0,093    | 0,156    | 0,216    | 0,616    | N/A | N/A | N/A | 1,254    |

Table-S14: H3 coded patient who was started Ribavirin on the 2nd day (viral loads in copies/mL and OD values on monitored days)

|          | 10       | 11       | 12       | 13       | 14       | 15       | 16       | 17       | 18       | 19       |
|----------|----------|----------|----------|----------|----------|----------|----------|----------|----------|----------|
| Serum    | 3,53E+06 | 3,71E+05 | 1,09E+04 | 1,64E+03 | 1,20E+04 | N/A      | Negative | 8,99E+03 | Negative | Negative |
| Nasal    | Negative | Negative | Negative | 2,22E+03 | 2,49E+02 | 1,00E+00 | 4,81E+01 | 1,65E+02 | Negative | Negative |
| Oral     | 7,20E+03 | 5,43E+04 | 6,65E+03 | 1,39E+03 | 1,96E+02 | Negative | Negative | Negative | Negative | Negative |
| Sweat    | Negative | Negative | Negative | Negative | Negative | 7,97E+01 | Negative | Negative | Negative | 5,18E+01 |
| Urine    | 1,49E+02 | 5,72E+01 | Negative | Negative | Negative | Negative | Negative | Negative | Negative | Negative |
| Urethral | N/A      | Negative | Negative | Negative | Negative | Negative | Negative | Negative | Negative | Negative |
| Fecal    | 4,71E+05 | 4,35E+04 | 1,17E+04 | 1,85E+03 | 4,32E+03 | 1,01E+03 | Negative | 1,02E+02 | 6,72E+01 | Negative |
| IGM      | 1,075    | 1,521    | 3        | 3        | 3        | 3        | 3        | 3        | 3        | N/A      |
| IGG      | 0,024    | 0,03     | 0,102    | 0,851    | 3        | 3        | 3        | 3        | 3        | N/A      |

Table-S15: H4 coded patient who was started Ribavirin on the 10th day (viral loads in copies/mL and OD values on monitored days)

|         | 5        | 6        | 7        | 8        | 9        | 10       | 11       | 12       | 13       |
|---------|----------|----------|----------|----------|----------|----------|----------|----------|----------|
| Serum   | 5,94E+05 | 2,33E+05 | 4,63E+04 | 2,97E+04 | 1,04E+04 | 3,33E+02 | 1,94E+03 | 5,83E+02 | Negative |
| Nasal   | Negative | 7,57E+02 | 2,27E+04 | 4,02E+03 | Negative | 2,25E+02 | 8,36E+01 | Negative | Negative |
| Oral    | 9,63E+04 | 5,19E+04 | 2,17E+03 | Negative | Negative | Negative | Negative | Negative | Negative |
| Urine   | 3,05E+03 | 2,71E+03 | 9,48E+02 | Negative | 1,41E+03 | Negative | 1,45E+03 | 1,77E+03 | 1,04E+03 |
| Vaginal | 6,55E+02 | 5,60E+04 | 4,20E+04 | 1,29E+04 | 5,26E+04 | 3,60E+02 | 9,22E+02 | 1,29E+02 | Negative |
| Fecal   | 3,02E+03 | 1,37E+03 | 4,82E+02 | 8,19E+02 | 4,34E+02 | 2,57E+02 | 2,10E+02 | Negative | Negative |
| IGM     | 0,351    | 0,608    | 2,277    | 3        | 3        | 3        | 3        | 3        | 3        |
| IGG     | 0,026    | 0,023    | 0,082    | 0,107    | 0,113    | 0,169    | 0,214    | 0,274    | 0,324    |

Table-S16: H5 coded patient who was started Ribavirin on the 5th day had reversible renal failure, vaginal bleeding but not hematuria nor gastrointestinal bleeding (viral loads in copies/mL and OD values on monitored days) \*While serum viral load decreases, viral load of urine is on the same log, on the 11th to 13th day.

|          | 9        | 10       | 11       | 12         | 13       | 14       | 15       | 16       | 17       |
|----------|----------|----------|----------|------------|----------|----------|----------|----------|----------|
| Serum    | 2,25E+02 | Negative | Negative | Negative   | Negative | Negative | Negative | Negative | Negative |
| Nasal    | 4,78E+01 | Negative | Negative | Negative   | Negative | Negative | Negative | Negative | Negative |
| Oral     | 1,96E+02 | Negative | Negative | Negative   | Negative | Negative | Negative | Negative | Negative |
| Urine    | 2,73E+04 | 7,19E+03 | 6,01E+04 | 2,10E+03   | 1,27E+04 | 2,17E+03 | Negative | 3,58E+03 | Negative |
| Urethral | Negative | 8,06E+02 | Negative | 1/4,90E+03 | Negative | Negative | Negative | Negative | Negative |
| Fecal    | Negative | Negative | Negative | Negative   | Negative | Negative | N/A      | Negative | Negative |
| IGM      | 2,128    | 1,726    | 1,404    | 1,305      | 1,386    | 0,967    | 0,855    | 0,791    | 0,552    |
| IGG      | 1,345    | 2,071    | 1,906    | 1,821      | 1,437    | 1,814    | 2,054    | 2,39     | 3        |

Table-S17: H6 coded patient (viral loads in copies/mL and OD values on monitored days) \*While serum CCHFV-RNA becomes negative, viral load of urine is on the same log, on the 11th to 14th day and positive on the 16th day.

|          | 5        | 6        | 7        | 8        | 9        | 10       | 11       | 12       | 13       |
|----------|----------|----------|----------|----------|----------|----------|----------|----------|----------|
| Serum    | 1,17E+05 | 2,02E+04 | 6,00E+03 | 5,46E+03 | 8,53E+02 | Negative | Negative | Negative | Negative |
| Nasal    | Negative | 7,08E+02 | 2,41E+02 | 3,69E+02 | 2,26E+02 | 3,47E+02 | 5,88E+01 | 2,02E+02 | Negative |
| Oral     | 1,97E+02 | 4,53E+03 | 3,88E+02 | Negative | Negative | Negative | Negative | Negative | Negative |
| Urine    | 4,74E+04 | 1,45E+03 | 8,16E+04 | 8,76E+04 | 3,89E+03 | 2,76E+04 | 6,77E+03 | 1,67E+04 | 5,88E+04 |
| Urethral | Negative | 5,81E+02 | Negative | N/A      | Negative | Negative | Negative | 4,54E+02 | Negative |
| Fecal    | 1,32E+03 | 4,79E+04 | 1,21E+04 | N/A      | 5,87E+03 | Negative | Negative | Negative | Negative |
| IGM      | 1,591    | 2,27     | 2,335    | 2,325    | 2,151    | 1,746    | 1,724    | 1,695    | 1,645    |
| IGG      | 0,02     | 0,051    | 0,096    | 0,186    | 0,396    | 0,405    | 0,461    | 0,72     | 1,252    |

Table-S18: H7 coded patient had reversible renal failure (viral loads in copies/mL and OD values on monitored days) \*While serum CCHFV-RNA decreases and becomes negative on the 10th day, viral load of urine is on the same log ranges, on the 10th to 13rd day.

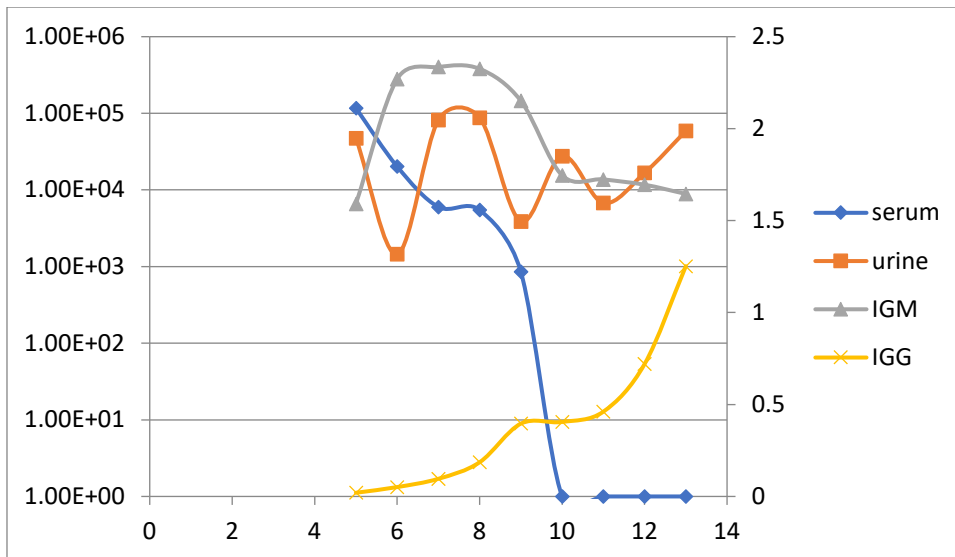

Figure S5: H7 coded patient's antibody response and viral load slope according to days
